# Supplementary material for: Regulatory Network Analysis Reveals Prognosis-Related CircRNAs in Pancreatic Cancer Cells
Source: Research Square preprint supplement (doi:10.21203/rs.3.rs-122183/v1), 2020-12-10
Supplement: Supplementary file 1 [file 4216cc2972440778be375491.docx]

**Cover letter**

Dear Editor,

We would like to submit the enclosed manuscript entitled " Regulatory Network Analysis Reveals Prognosis-related CircRNAs in Pancreatic Cancer Cells", which we wish to be considered for publication in Journal of Translational Medicine.

The work described has not been submitted elsewhere for publication, in whole or in part, and all the authors listed have approved the manuscript that is enclosed. We believe that two aspects of this manuscript will make it interesting to general readers of your journal.

First, a key prognosis-related regulatory network in pancreatic cancers was constructed through bioinformatics analysis of public RNA databases such as NCBI GEO and EBI ArrayExpress, and miR-146b-5p and miR-152 were the key regulatory factors.

Second, CircRNAs with significantly aberrant expression levels included in the network were verified by qRT-PCR in five pancreatic cancer cell lines. Hsa_circ_0006502 was identified as a new tumor suppressor that inhibits cancer cell growth, migration and invasion and might serve as a potential therapeutic agent.

Thank you very much for your time and consideration.

Sincerely yours,

Heying Zhang, Juan Zeng, Yuexian Li, Cheng Sun, Yonggang Tan and Huawei Zou
