# Supplementary material for: Regulatory Network Analysis Reveals Prognosis-Related CircRNAs in Pancreatic Cancer Cells
Source: Research Square preprint supplement (doi:10.21203/rs.3.rs-122183/v1), 2020-12-10
Supplement: Supplementary file 2 [file dab69e1bc39dacdd5ea79193.docx]

Supplementary Figure legends

Supplementary fig. 1 MetaQC parameters table of miRNA and mRNA datasets.

Supplementary fig. 2 Amplification plots and dissociation curves of circRNAs.

Supplementary fig. 3 Overexpression of hsa_circ_0006502.
